# Supplementary material for: Silica@layered double hydroxide core–shell hybrid materials
Source: Royal Society of Chemistry journal article supplement (doi:10.1039/c7dt03861e), 2017-11-28
Supplement: c7dt03861e1.pdf [file c7dt03861e1.pdf]

## SUPPLEMENTARY DATA

### **Silica@Layered Double Hydroxide Core-shell Hybrid Materials**

Wing Lam Joyce Kwok, Dana-Georgiana Crivoi, Chunping Chen, Jean-Charles Buffet and  
Dermot O'Hare

Chemistry Research Laboratory, University of Oxford, 12 Mansfield Road, Oxford, OX1 3TA, UK

#### **Table of Contents**

|                       |     |
|-----------------------|-----|
| 1. General details    | S2  |
| 2. Supporting Figures | S4  |
| 3. Supporting Tables  | S10 |

## 1. General details

The specific surface area of the samples was determined by the Brunauer-Emmett-Teller (BET) method using the N<sub>2</sub> adsorption and desorption isotherms collected at 77 K on a Micromeritics TriStar II 3030 instrument. The samples were degassed at 110 °C overnight before analysis.

Fourier transform infrared (FTIR) spectra were collected on a ThermoScientific Nicolet iS5 spectrometer fitted with an iD3 ATR (attenuated total reflection) accessory. The instrument was set to record 40 scans between 4000 – 700 cm<sup>-1</sup> at 4 cm<sup>-1</sup> resolution.

Powder X-ray diffraction data were collected on a PANAnalytical X'Pert Pro Diffractometer in scanning mode using Cu K $\alpha$  radiation ( $\alpha_1 = 1.540598 \text{ \AA}$ ,  $\alpha_2 = 1.54426 \text{ \AA}$ , weighted average = 1.541847  $\text{\AA}$ ). Scans were recorded between  $2\theta = 3.0 - 80^\circ$ , with step size  $0.017^\circ$  and scan step time 26.67 s. The samples were mounted on stainless steel holders that gave rise to peaks at 43.36, 44.29, and  $50.51^\circ$  (these did not interfere with the analysis).

Scanning electron microscopy (SEM) was performed at the Harwell Research Complex on a JSM-6610LV microscope with an accelerating voltage of 200 kV. Samples were prepared by dispersion in ethanol using sonication, cast onto carbon tabs and sputter coated with 10 nm Au using a Quorum Q150T ES.

Thermogravimetric analyses (TGA) was carried out on a Mettler Toledo TGA/DSC 1 system. Samples (10 mg) were heated in an alumina crucible from 25 to 800 °C (at  $5^\circ\text{C min}^{-1}$ ) under a stream of N<sub>2</sub> flowing at  $100 \text{ cm}^3 \text{ min}^{-1}$ .

Transmission electron spectroscopy (TEM) images were acquired at the Harwell Research Complex on a JEOL 2100 microscope with an accelerating voltage of 200 kV. Samples were prepared by dispersion in ethanol using sonication and cast onto copper grids coated with carbon mesh.

Solid state <sup>27</sup>Al DPMAS solid-state nuclear magnetic resonance (NMR) spectra were collected by Dr Nicholas Rees (University of Oxford) at 104.2 MHz (9.4 T) on a Bruker Avance III HD spectrometer. In order to obtain quantitative MAS spectra, a single pulse excitation was applied using a short pulse length (0.23  $\mu\text{s}$ ). 7000 scans were acquired with a 0.1 s delay and a MAS rate of 15 kHz using 4 mm O.D zirconia rotors. The <sup>27</sup>Al chemical shift is externally referenced to an aqueous solution of Al(NO<sub>3</sub>)<sub>3</sub>.

## 2. Supporting Figures

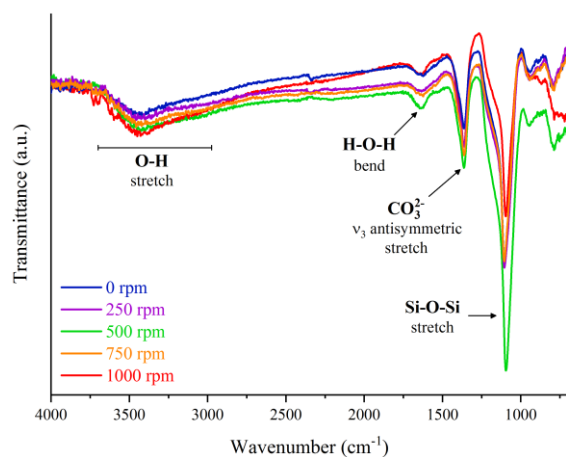

Fig. S1 FTIR spectra of  $\text{SiO}_2@\text{Mg}_2\text{Al-CO}_3\text{-AMO-LDHs}$  synthesised with a metal addition of  $0.43 \text{ mmol h}^{-1}$  and different stirring speeds.

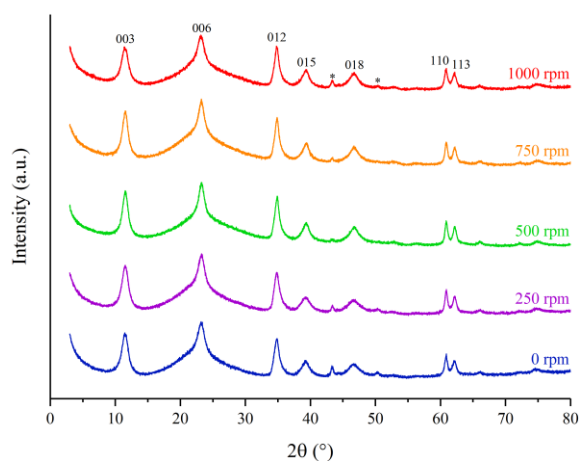

Fig. S2 Powder XRD diffractograms of  $\text{SiO}_2@\text{Mg}_2\text{Al-CO}_3\text{-AMO-LDHs}$  synthesised with a metal addition rate of  $0.43 \text{ mmol h}^{-1}$  and different stirring speeds.

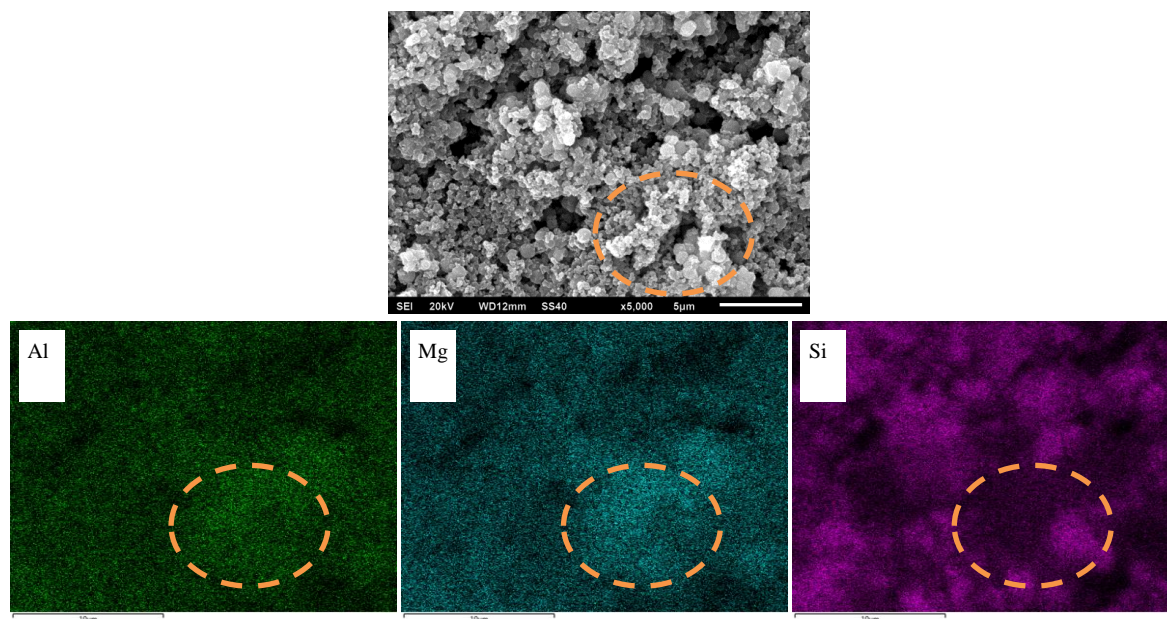

Fig. S3 SEM and SEM-EDS images of  $\text{SiO}_2@\text{Mg}_2\text{Al-CO}_3\text{-AMO-LDHs}$  synthesised using a metal addition rate of  $0.11 \text{ mmol h}^{-1}$  and without stirring (e.g. 0 rpm).

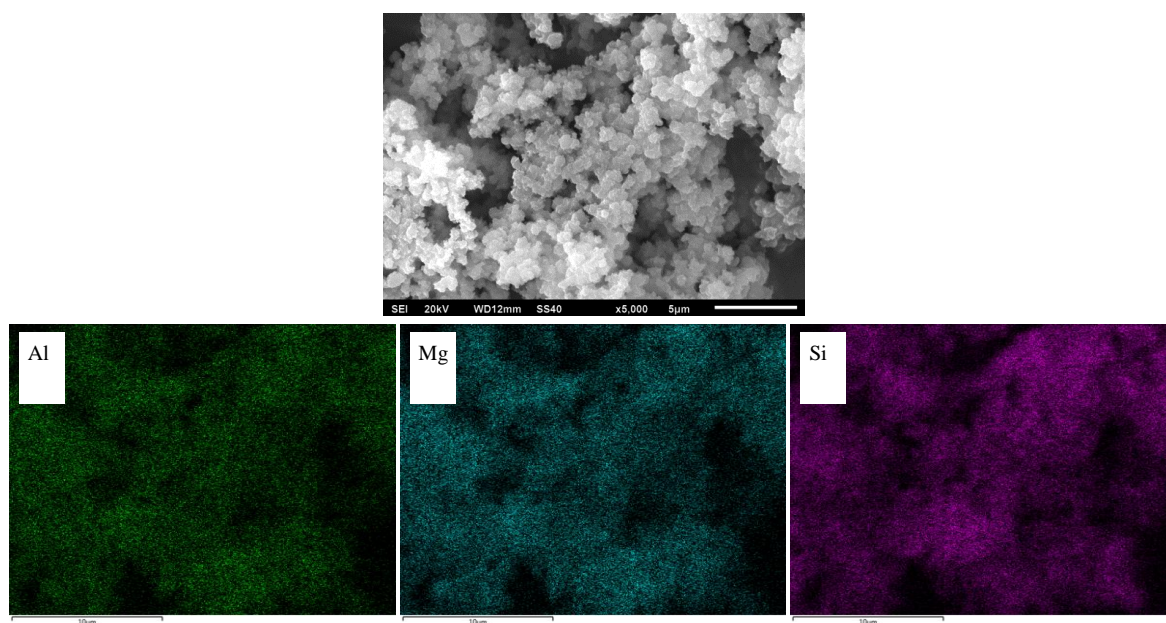

Fig. S4 SEM and SEM-EDS images of  $\text{SiO}_2@\text{Mg}_2\text{Al-CO}_3\text{-AMO-LDHs}$  synthesised using a metal addition rate of  $0.11 \text{ mmol h}^{-1}$  and a stirring speed of 500 rpm.

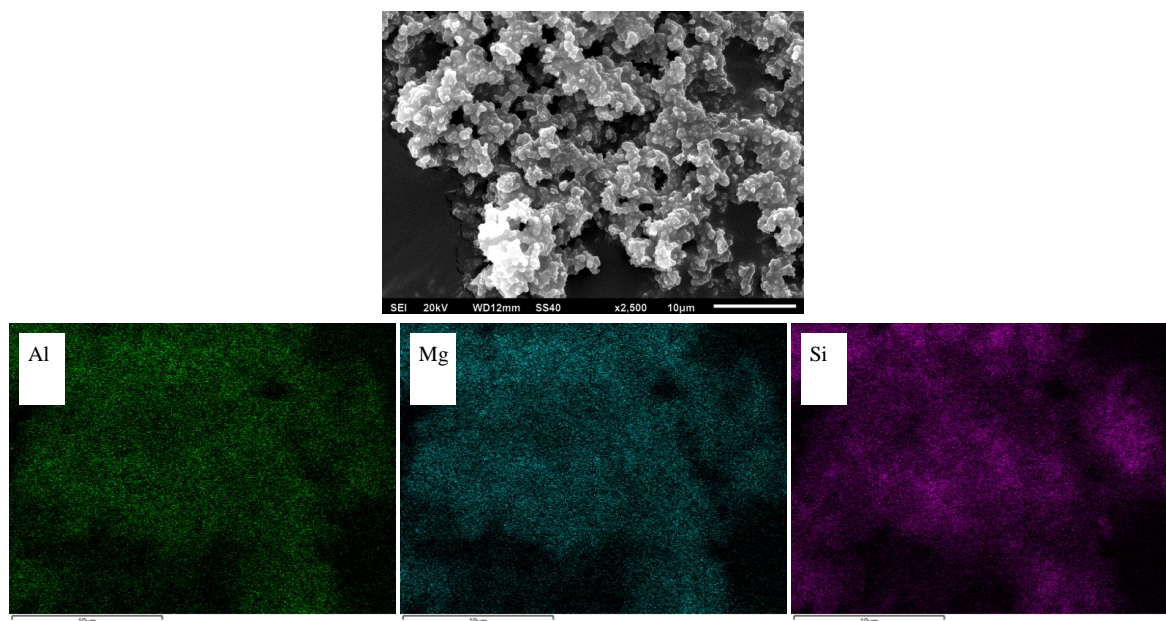

Fig. S5 SEM and SEM-EDS images of  $\text{SiO}_2@\text{Mg}_2\text{Al-CO}_3\text{-AMO-LDHs}$  synthesised using a metal addition rate of  $0.11 \text{ mmol h}^{-1}$  and a stirring speed of 1000 rpm.

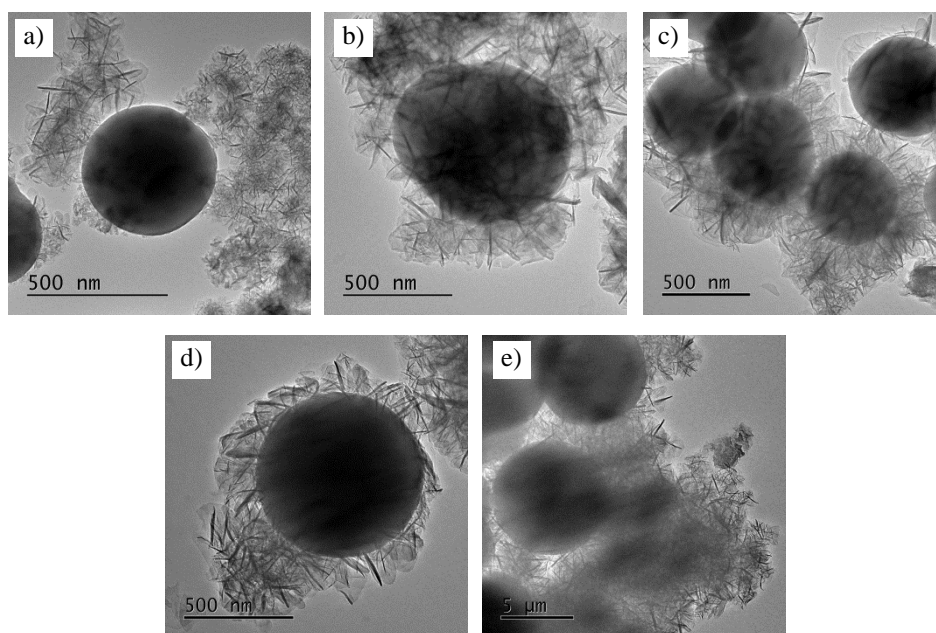

Fig. S6 TEM images of  $\text{SiO}_2@\text{Mg}_2\text{Al-CO}_3\text{-AMO-LDHs}$  synthesised with metal addition rate  $0.11 \text{ mmol h}^{-1}$  at different stirring speeds: a) 0, b) 250, c) 500, d) 750, and e) 1000 rpm.

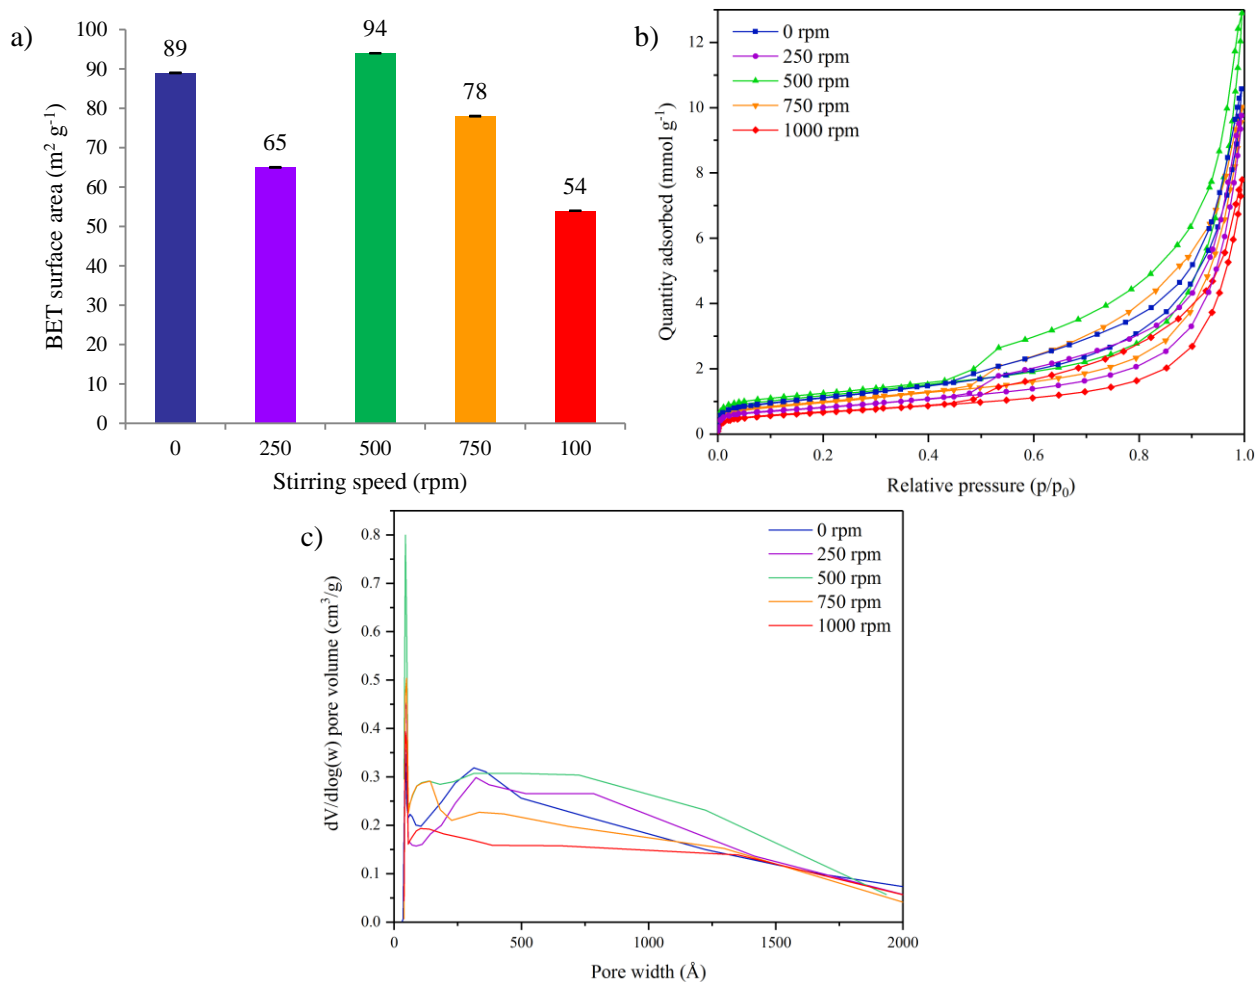

Fig. S7 a) Bar chart showing the BET areas of  $\text{SiO}_2@Mg_2Al\text{-CO}_3\text{-AMO-LDHs}$  synthesised as stirring speeds between 0 – 1000 rpm at a fixed metal addition rate of  $0.11 \text{ mmol h}^{-1}$ , b) the corresponding  $N_2$  sorption isotherms, and c) the corresponding BJH (desorption) pore size distributions.

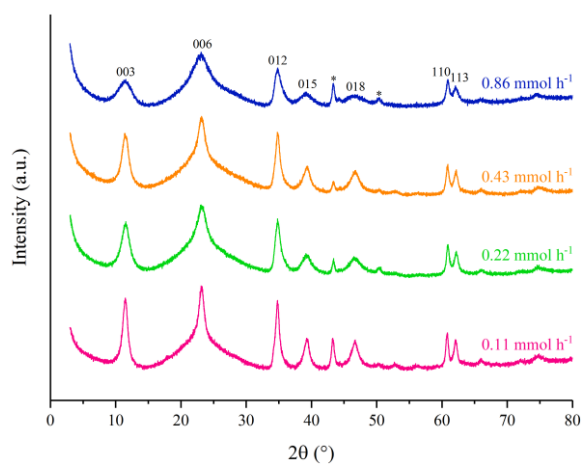

Fig. S8 Powder XRD diffractograms of  $\text{SiO}_2@Mg_2Al\text{-CO}_3\text{-AMO-LDHs}$  synthesised with different metal addition rates and at a stirring speed of 1000 rpm.

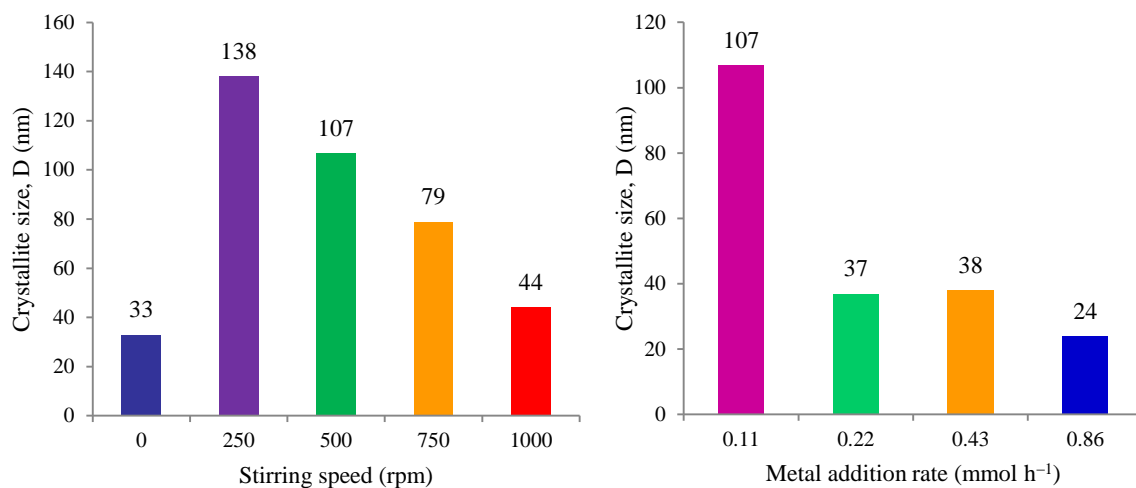

Fig. S9 Crystallite sizes, calculated by the Scherrer equation using the (110) reflection, as a function of a) stirring speed at a constant metal addition rate of 0.11 mmol h<sup>-1</sup> and b) metal addition rate at a constant stirring speed of 500 rpm.

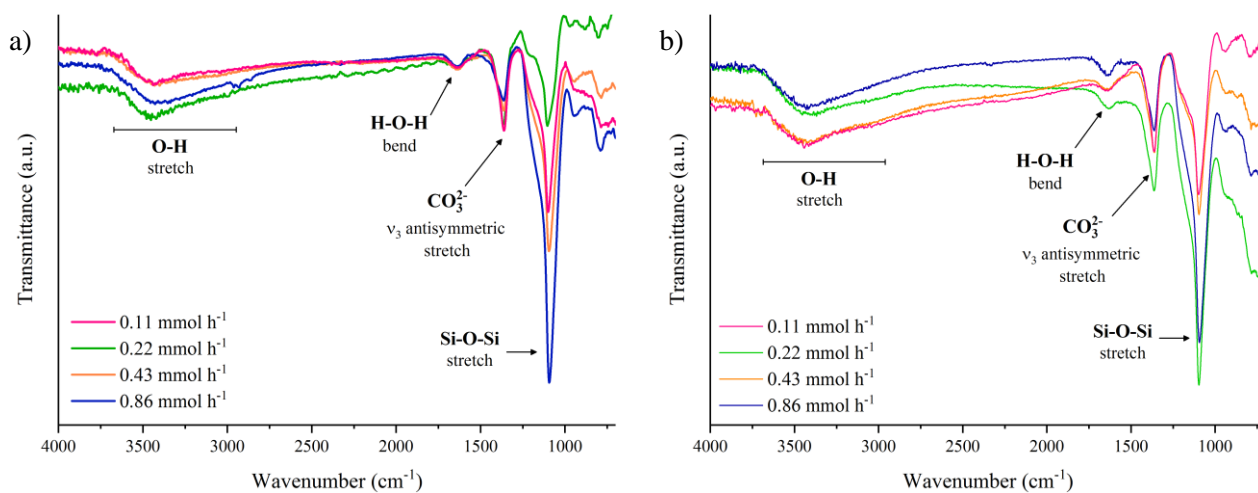

Fig. S10 FTIR spectra of SiO<sub>2</sub>@Mg<sub>2</sub>Al-CO<sub>3</sub>-AMO-LDHs synthesised with different metal addition rates and at stirring speeds of a) 500 and b) 1000 rpm.

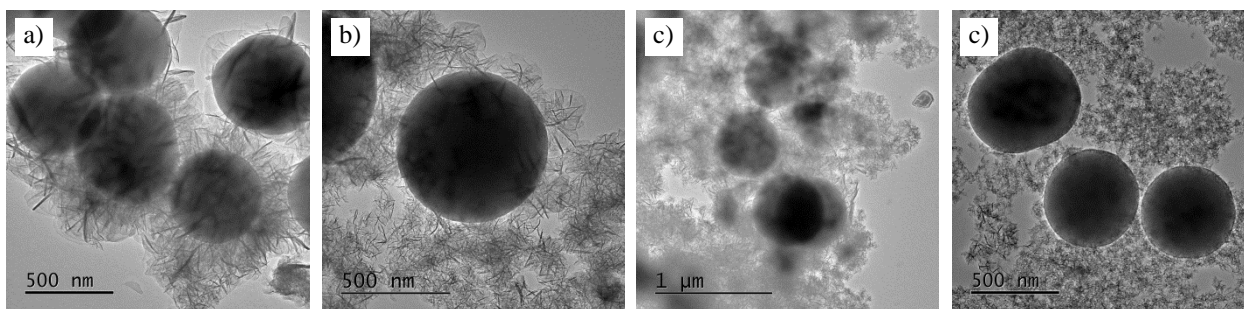

Fig. S11 TEM images of SiO<sub>2</sub>@Mg<sub>2</sub>Al-CO<sub>3</sub>-AMO-LDHs synthesised using various metal addition rates: a) 0.11, b) 0.22, c) 0.43, and d) 0.84 mmol h<sup>-1</sup>. The stirring speed was kept constant at 500 rpm.

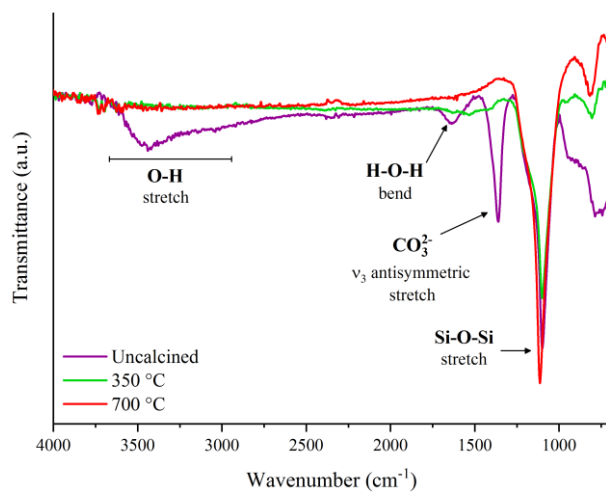

Fig. S12 FTIR spectra of  $\text{SiO}_2@Mg_2Al\text{-CO}_3\text{-AMO-LDH}$ , synthesised with a metal addition rate of  $0.11 \text{ mmol h}^{-1}$  and a stirring speed of 500 rpm, and its calcined products.

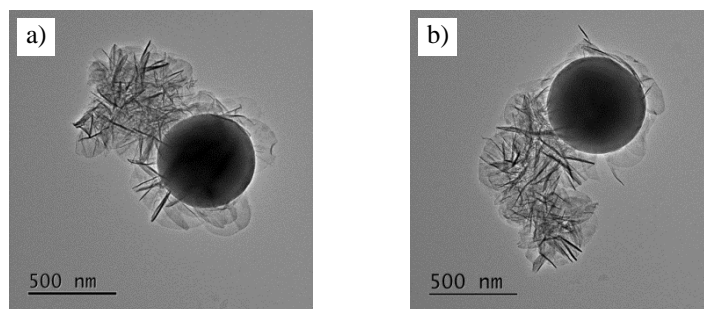

Fig. S13 TEM images of  $\text{SiO}_2@Mg_2Al\text{-CO}_3\text{-AMO-LDH}$ , synthesised with a metal addition rate of  $0.11 \text{ mmol h}^{-1}$  and a stirring speed of 500 rpm, calcined at a) 350 and b) 700 °C.



### 3. Supporting Tables

Table S1 Chemical formulae of the core-shell materials derived from TGA and dTGA.

| Sample name <sup>a</sup> | Formula calculated                                                                                                                                                   |
|--------------------------|----------------------------------------------------------------------------------------------------------------------------------------------------------------------|
| 0.11-500                 | SiO <sub>2</sub> @[Mg <sub>0.67</sub> Al <sub>0.33</sub> (OH) <sub>2</sub> (CO <sub>3</sub> ) <sub>0.17</sub> · 0.30(H <sub>2</sub> O) · 0.12(EtOH)] <sub>0.59</sub> |
| 0.86-500                 | SiO <sub>2</sub> @[Mg <sub>0.67</sub> Al <sub>0.33</sub> (OH) <sub>2</sub> (CO <sub>3</sub> ) <sub>0.17</sub> · 0.23(H <sub>2</sub> O) · 0.16(EtOH)] <sub>0.63</sub> |
| 0.86-1000                | SiO <sub>2</sub> @[Mg <sub>0.67</sub> Al <sub>0.33</sub> (OH) <sub>2</sub> (CO <sub>3</sub> ) <sub>0.17</sub> · 0.21(H <sub>2</sub> O) · 0.18(EtOH)] <sub>0.63</sub> |

<sup>a</sup>Samples are labelled with reference to the metal addition rate and stirring speed: e.g. "0.11-500" refers to a SiO<sub>2</sub>@Mg<sub>2</sub>Al-CO<sub>3</sub>-AMO-LDH synthesised with a metal addition rate of 0.11 mmol h<sup>-1</sup> and stirring speed of 500 rpm.

Table S2 Crystallite sizes of SiO<sub>2</sub>@Mg<sub>2</sub>Al-CO<sub>3</sub>-AMO-LDHs calculated by the Scherrer equation using the (110) Bragg reflections. The metal addition rate was 0.11 mmol h<sup>-1</sup>.

| Stirring speed (rpm) | 2θ(°) | cos θ | FWHM (°) | d <sub>110</sub> (Å) | D = 0.89λ/βcosθ (nm) |
|----------------------|-------|-------|----------|----------------------|----------------------|
| 0                    | 60.96 | 0.59  | 0.40     | 1.5                  | 33                   |
| 250                  | 60.89 | 0.57  | 0.10     | 1.5                  | 138                  |
| 500                  | 60.85 | 0.55  | 0.13     | 1.5                  | 107                  |
| 750                  | 60.84 | 0.54  | 0.18     | 1.5                  | 78                   |
| 1000                 | 60.81 | 0.53  | 0.33     | 1.5                  | 44                   |

λ = 1.541847 Å, β = FWHM in radians

Table S3 N<sub>2</sub> BET areas of SiO<sub>2</sub>@Mg<sub>2</sub>Al-CO<sub>3</sub>-AMO-LDHs synthesised with a metal addition rate of 0.11 mmol h<sup>-1</sup>.

| Stirring speed (rpm) | BET area (m <sup>2</sup> /g) | Error <sup>a</sup> |
|----------------------|------------------------------|--------------------|
| 0                    | 89                           | ±0.09              |
| 250                  | 65                           | ±0.04              |
| 500                  | 94                           | ±0.06              |
| 750                  | 78                           | ±0.06              |
| 1000                 | 54                           | ±0.10              |

<sup>a</sup>Mathematical error associated with the fit of the data to the BET equation.

Table S4 Ratio of tetrahedral (T<sub>d</sub>) and octahedral (O<sub>h</sub>) aluminium species in SiO<sub>2</sub>@Mg<sub>2</sub>Al-CO<sub>3</sub>-AMO-LDHs synthesised with metal addition rate 0.43 mmol h<sup>-1</sup> calculated from solid state <sup>27</sup>Al DPMAS NMR.

| Stirring speed (rpm) | T <sub>d</sub> Al/O <sub>h</sub> Al ratio |
|----------------------|-------------------------------------------|
| 500                  | 1:8                                       |
| 750                  | 1:11                                      |

Table S5 N<sub>2</sub> BET areas of SiO<sub>2</sub>@Mg<sub>2</sub>Al-CO<sub>3</sub>-AMO-LDHs.

| Metal addition rate (mmol h <sup>-1</sup> ) | Stirring speed (rpm) | BET area (m <sup>2</sup> /g) | Error <sup>a</sup> |
|---------------------------------------------|----------------------|------------------------------|--------------------|
| 0.11                                        | 500                  | 94                           | ±0.06              |
| 0.86                                        | 500                  | 100                          | ±0.22              |
| 0.11                                        | 1000                 | 54                           | ±0.10              |
| 0.43                                        | 1000                 | 58                           | ±0.16              |

<sup>a</sup>Mathematical error associated with the fit of the data to the BET equation.
